# Supplementary material for: A self-assembling collagen mimetic peptide system to simultaneously characterize the effects of osteogenesis imperfecta mutations on conformation, assembly and activity
Source: Royal Society of Chemistry journal article supplement (doi:10.1039/c9tb00086k), 2019-01-01
Supplement: c9tb00086k1.pdf [file c9tb00086k1.pdf]

# A self-assembling collagen mimetic peptide system to simultaneously characterize the effects of osteogenesis imperfecta mutations on conformation, assembly and activity

*Xiuxia Sun, Zhao Liu, Sha Zhao, Xiaojun Xu, Shenlin Wang, Chenchen Guo, Jianxi*

*Xiao*

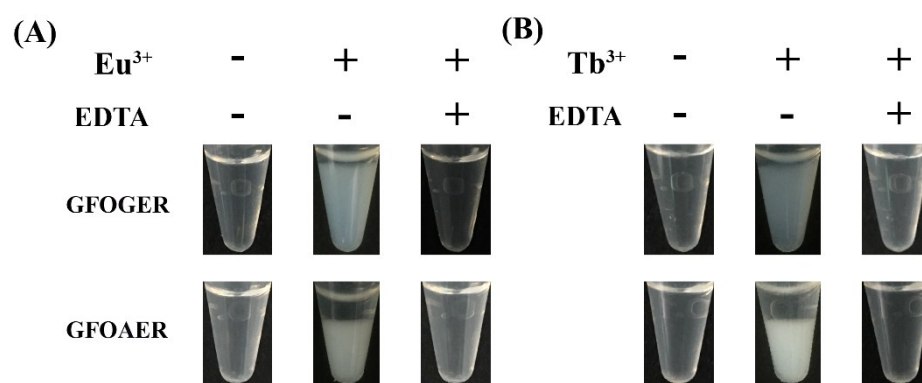

**Figure S1.**  $\text{Eu}^{3+}/\text{Tb}^{3+}$ - mediated assembly of peptides GFOGER and GFOAER. The photographs show the visual changes of the two peptide solutions prior to and following the addition of  $\text{Eu}^{3+}$  (A) and  $\text{Tb}^{3+}$  (B) and EDTA.

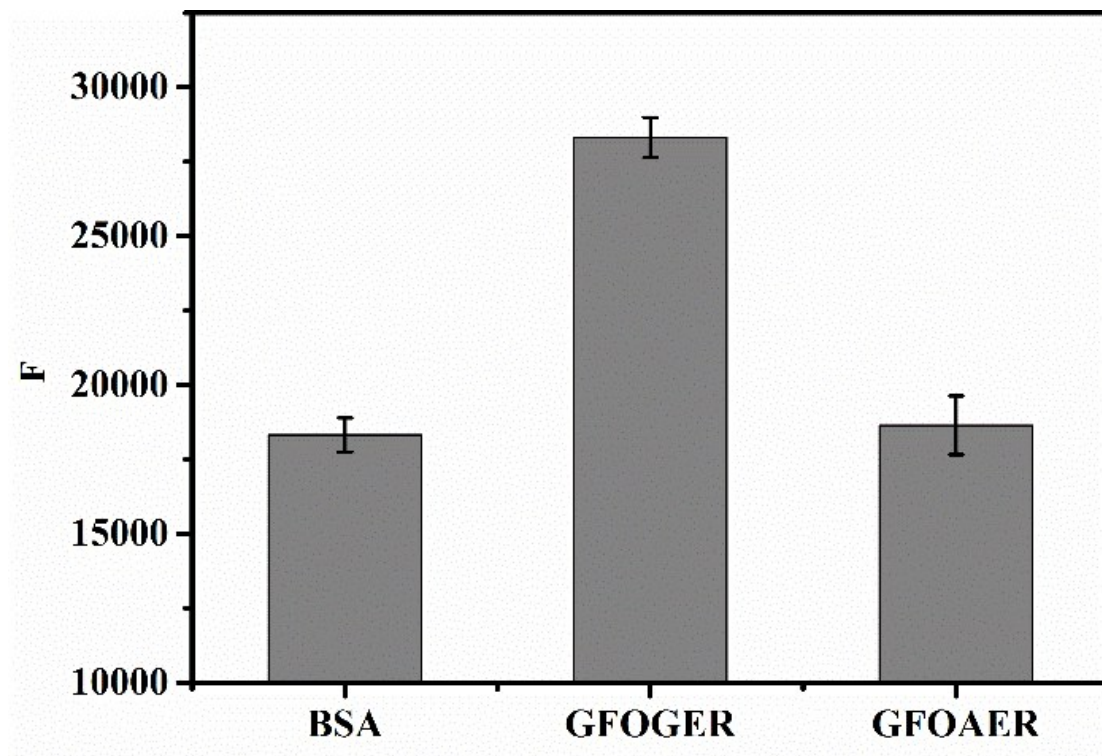

**Figure S2.** Adhesion of HeLa cells as a function of surface composition: BSA, peptide GFOGER and peptide GFOAER.
